# Supplementary material for: Depressive symptoms and cardiovascular disease: a population-based study of older adults in rural Burkina Faso
Source: PubMed Central journal article supplement (PMC7757460; doi:10.1136/bmjopen-2020-038199), 2020-12-22
Supplement: bmjopen-2020-038199supp001.pdf [file bmjopen-2020-038199supp001.pdf]

**SUPPLEMENTARY MATERIAL**

**Supplementary Figure 1:** This figure shows the distribution of the mean raw PHQ-9 values by single interviewers. The differences between interviewers' PHQ-9 values were interpreted as an interviewer effect during analyses. We decided to standardize the results on the interviewer level and add them up afterwards.

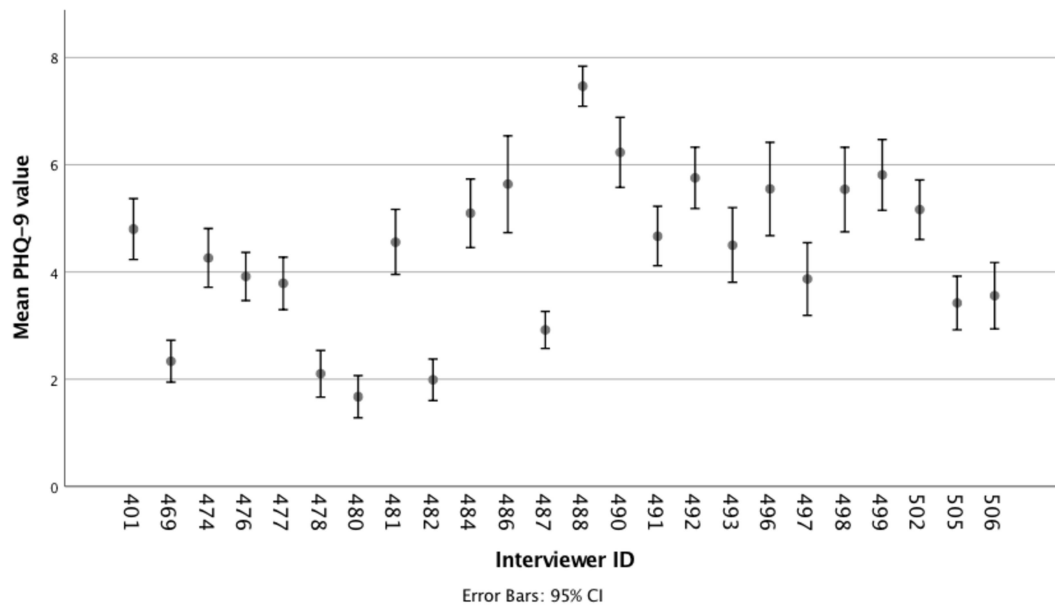

**Supplementary Figure 2:** The figure shows the standardized PHQ-9 values of one of the interviewers (401) and the normal distribution curve. We z-scored the PHQ-9 results for this interviewer with the standardization function in SPSS. Each value was calculated by dividing the difference between the value and the mean by the standard deviation. This was done for all interviewers separately. Afterwards, all values were included in the outcome variable of the z-scored PHQ-9 score.

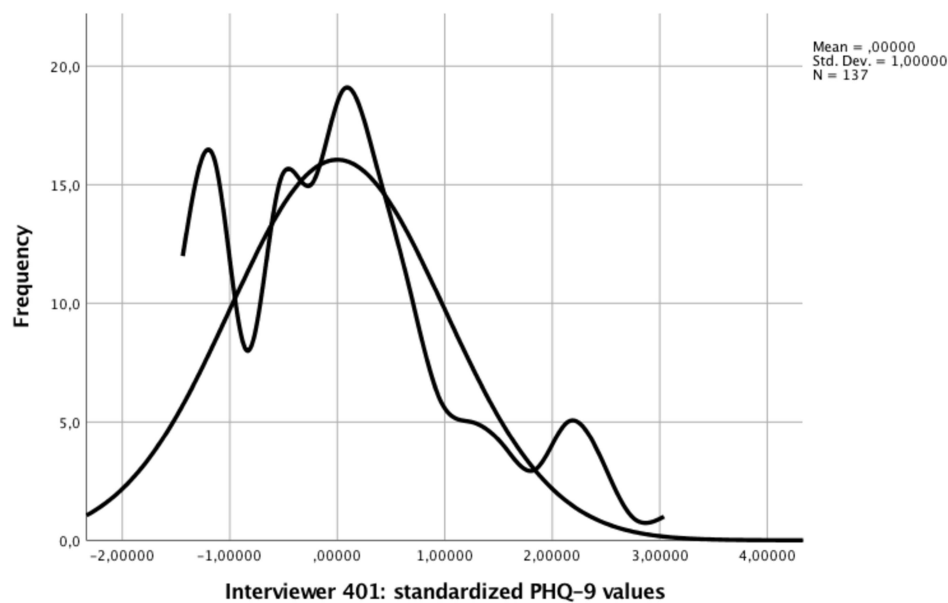

|   |       | PHQ-9 value | CI lower | CI upper | 2 Std. Dev. |
|---|-------|-------------|----------|----------|-------------|
| m | 40-44 | -0,414      | -0,493   | -0,336   | 0,078       |
| w | 40-44 | -0,160      | -0,252   | -0,067   | 0,092       |
| m | 45-49 | -0,403      | -0,496   | -0,311   | 0,092       |
| w | 45-49 | -0,087      | -0,196   | 0,022    | 0,109       |
| m | 50-54 | -0,259      | -0,359   | -0,158   | 0,100       |
| w | 50-54 | 0,025       | -0,084   | 0,135    | 0,110       |
| m | 55-59 | -0,135      | -0,285   | 0,015    | 0,150       |
| w | 55-59 | 0,162       | 0,030    | 0,293    | 0,131       |
| m | 60-64 | -0,016      | -0,175   | 0,142    | 0,159       |
| w | 60-64 | 0,428       | 0,284    | 0,572    | 0,144       |
| m | 65-69 | 0,297       | 0,111    | 0,484    | 0,186       |
| w | 65-69 | 0,552       | 0,393    | 0,710    | 0,159       |
| m | 70-74 | 0,369       | 0,085    | 0,653    | 0,284       |
| w | 70-74 | 0,571       | 0,337    | 0,806    | 0,235       |
| m | 75+   | 0,881       | 0,553    | 1,210    | 0,328       |
| w | 75+   | 0,795       | 0,541    | 1,050    | 0,254       |

| <b>Supplementary Table 2: Prevalence of the metabolic syndrome</b> |       |            |          |          |
|--------------------------------------------------------------------|-------|------------|----------|----------|
|                                                                    |       | Proportion | CI lower | CI upper |
| m                                                                  | 40-44 | 0,082      | 0,054    | 0,118    |
| w                                                                  | 40-44 | 0,120      | 0,083    | 0,166    |
| m                                                                  | 45-49 | 0,150      | 0,110    | 0,197    |
| w                                                                  | 45-49 | 0,183      | 0,133    | 0,242    |
| m                                                                  | 50-54 | 0,103      | 0,064    | 0,155    |
| w                                                                  | 50-54 | 0,210      | 0,158    | 0,271    |
| m                                                                  | 55-59 | 0,101      | 0,059    | 0,159    |
| w                                                                  | 55-59 | 0,244      | 0,183    | 0,315    |
| m                                                                  | 60-64 | 0,140      | 0,079    | 0,224    |
| w                                                                  | 60-64 | 0,190      | 0,130    | 0,263    |
| m                                                                  | 65-69 | 0,082      | 0,034    | 0,162    |
| w                                                                  | 65-69 | 0,274      | 0,195    | 0,364    |
| m                                                                  | 70-74 | 0,097      | 0,036    | 0,199    |
| w                                                                  | 70-74 | 0,273      | 0,177    | 0,386    |
| m                                                                  | 75+   | 0,057      | 0,012    | 0,157    |
| w                                                                  | 75+   | 0,282      | 0,186    | 0,395    |

| <b>Supplementary Table 3: Prevalence of a positive screening result for pre-diabetes</b> |       |            |          |          |
|------------------------------------------------------------------------------------------|-------|------------|----------|----------|
|                                                                                          |       | Proportion | CI lower | CI upper |
| m                                                                                        | 40-44 | 0,413      | 0,351    | 0,476    |
| w                                                                                        | 40-44 | 0,378      | 0,315    | 0,444    |
| m                                                                                        | 45-49 | 0,416      | 0,351    | 0,483    |
| w                                                                                        | 45-49 | 0,468      | 0,395    | 0,542    |
| m                                                                                        | 50-54 | 0,503      | 0,423    | 0,583    |
| w                                                                                        | 50-54 | 0,503      | 0,430    | 0,576    |
| m                                                                                        | 55-59 | 0,392      | 0,308    | 0,482    |
| w                                                                                        | 55-59 | 0,532      | 0,451    | 0,611    |
| m                                                                                        | 60-64 | 0,442      | 0,328    | 0,559    |
| w                                                                                        | 60-64 | 0,425      | 0,338    | 0,516    |
| m                                                                                        | 65-69 | 0,444      | 0,319    | 0,575    |
| w                                                                                        | 65-69 | 0,473      | 0,377    | 0,570    |
| m                                                                                        | 70-74 | 0,481      | 0,340    | 0,624    |
| w                                                                                        | 70-74 | 0,515      | 0,389    | 0,640    |
| m                                                                                        | 75+   | 0,591      | 0,432    | 0,737    |
| w                                                                                        | 75+   | 0,515      | 0,390    | 0,638    |

| <b>Supplementary Table 4: Prevalence of a positive screening result for diabetes mellitus</b> |       |            |          |          |
|-----------------------------------------------------------------------------------------------|-------|------------|----------|----------|
|                                                                                               |       | Proportion | CI lower | CI upper |
| m                                                                                             | 40-44 | 0,028      | 0,011    | 0,058    |
| w                                                                                             | 40-44 | 0,049      | 0,025    | 0,085    |
| m                                                                                             | 45-49 | 0,065      | 0,036    | 0,107    |
| w                                                                                             | 45-49 | 0,072      | 0,039    | 0,120    |
| m                                                                                             | 50-54 | 0,058      | 0,027    | 0,108    |
| w                                                                                             | 50-54 | 0,061      | 0,031    | 0,107    |
| m                                                                                             | 55-59 | 0,080      | 0,039    | 0,142    |
| w                                                                                             | 55-59 | 0,069      | 0,034    | 0,124    |
| m                                                                                             | 60-64 | 0,097      | 0,040    | 0,190    |
| w                                                                                             | 60-64 | 0,105      | 0,057    | 0,173    |
| m                                                                                             | 65-69 | 0,035      | 0,004    | 0,121    |
| w                                                                                             | 65-69 | 0,107      | 0,055    | 0,183    |
| m                                                                                             | 70-74 | 0,021      | 0,001    | 0,113    |
| w                                                                                             | 70-74 | 0,125      | 0,056    | 0,232    |
| m                                                                                             | 75+   | 0,119      | 0,040    | 0,256    |
| w                                                                                             | 75+   | 0,111      | 0,046    | 0,216    |

|   |       | Proportion | CI lower | CI upper |
|---|-------|------------|----------|----------|
| m | 40-44 | 0,182      | 0,144    | 0,225    |
| w | 40-44 | 0,169      | 0,128    | 0,217    |
| m | 45-49 | 0,227      | 0,182    | 0,277    |
| w | 45-49 | 0,222      | 0,172    | 0,279    |
| m | 50-54 | 0,235      | 0,181    | 0,297    |
| w | 50-54 | 0,274      | 0,220    | 0,334    |
| m | 55-59 | 0,306      | 0,241    | 0,378    |
| w | 55-59 | 0,294      | 0,232    | 0,362    |
| m | 60-64 | 0,344      | 0,261    | 0,434    |
| w | 60-64 | 0,362      | 0,291    | 0,438    |
| m | 65-69 | 0,355      | 0,265    | 0,454    |
| w | 65-69 | 0,407      | 0,325    | 0,493    |
| m | 70-74 | 0,333      | 0,227    | 0,454    |
| w | 70-74 | 0,380      | 0,281    | 0,488    |
| m | 75+   | 0,379      | 0,262    | 0,507    |
| w | 75+   | 0,442      | 0,345    | 0,543    |

**Supplementary Table 6: Linear regression model 1  
(Metabolic syndrome)**

|                           |                | Model 1 (n=2524) |        |         |       |
|---------------------------|----------------|------------------|--------|---------|-------|
|                           |                | beta             | CI low | CI high | p     |
| Age                       | 40-44          | -                | -      | -       | -     |
|                           | 45-49          | .007             | -.037  | .050    | .773  |
|                           | 50-54          | .058             | .014   | .098    | .010  |
|                           | 55-59          | .098             | .053   | .136    | <.001 |
|                           | 60-64          | .144             | .101   | .184    | <.001 |
|                           | 65-69          | .182             | .139   | .221    | <.001 |
|                           | 70-74          | .147             | .104   | .183    | <.001 |
|                           | 75+            | .251             | .215   | .298    | <.001 |
| Sex (ref: male)           |                | .115             | .074   | .151    | <.001 |
| Living in the countryside |                | -.052            | -.088  | -.011   | .013  |
| Currently married         |                | -.020            | -.065  | .022    | .340  |
| Education                 | None           |                  |        |         |       |
|                           | Some           | .018             | -.020  | .054    | .360  |
|                           | Primary & more | -.049            | -.088  | -.009   | .016  |
| Ethnicity                 | Dafin          |                  |        |         |       |
|                           | Bwama          | .017             | -.022  | .053    | .430  |
|                           | Mossi          | .007             | -.028  | .040    | .734  |
|                           | Other          | .022             | -.024  | .082    | .280  |
| Wealth quintile           | 1              |                  |        |         |       |
|                           | 2              | -.030            | -.074  | .016    | .208  |
|                           | 3              | -.051            | -.096  | -.003   | .038  |
|                           | 4              | -.058            | -.103  | -.009   | .019  |
|                           | 5              | -.083            | -.135  | -.033   | .001  |
| <b>Metabolic syndrome</b> |                | -.004            | -.040  | .033    | .847  |

**Supplementary Table 7: Linear regression model 2**  
**Abdominal Obesity**

|                           |                | Model 2 (n=2970) |        |         |       |
|---------------------------|----------------|------------------|--------|---------|-------|
|                           |                | beta             | CI low | CI high | p     |
| Age                       | 40-44          | -                | -      | -       | -     |
|                           | 45-49          | .017             | -.024  | .058    | .406  |
|                           | 50-54          | .059             | .019   | .099    | .004  |
|                           | 55-59          | .101             | .062   | .140    | <.001 |
|                           | 60-64          | .143             | .104   | .181    | <.001 |
|                           | 65-69          | .189             | .150   | .226    | <.001 |
|                           | 70-74          | .164             | .126   | .200    | <.001 |
|                           | 75+            | .239             | .200   | .275    | <.001 |
| Sex (ref: male)           |                | .118             | .081   | .153    | <.001 |
| Living in the countryside |                | -.047            | -.078  | -.008   | .016  |
| Currently married         |                | -.028            | -.072  | .010    | .143  |
| Education                 | None           |                  |        |         |       |
|                           | Some           | .019             | -.016  | .053    | .288  |
|                           | Primary & more | -.033            | -.071  | .003    | .072  |
| Ethnicity                 | Dafin          |                  |        |         |       |
|                           | Bwama          | .021             | -.017  | .055    | .302  |
|                           | Mossi          | -.001            | -.033  | .031    | .944  |
|                           | Other          | .026             | -.015  | .080    | .180  |
| Wealth quintile           | 1              |                  |        |         |       |
|                           | 2              | -.020            | -.062  | .023    | .372  |
|                           | 3              | -.056            | -.100  | -.012   | .013  |
|                           | 4              | -.066            | -.110  | -.021   | .004  |
|                           | 5              | -.087            | -.135  | -.040   | <.001 |
| <b>Abdominal Obesity</b>  |                | .007             | -.028  | .042    | .680  |



**Supplementary Table 8: Linear regression model 3  
(Hypertriglyceridemia)**

|                             |                | Model 3 (n=2890) |        |         |       |
|-----------------------------|----------------|------------------|--------|---------|-------|
|                             |                | beta             | CI low | CI high | p     |
| Age                         | 40-44          | -                | -      | -       | -     |
|                             | 45-49          | .013             | -.028  | .055    | .531  |
|                             | 50-54          | .064             | .022   | .104    | .002  |
|                             | 55-59          | .098             | .057   | .137    | <.001 |
|                             | 60-64          | .144             | .103   | .182    | <.001 |
|                             | 65-69          | .186             | .144   | .221    | <.001 |
|                             | 70-74          | .159             | .120   | .194    | <.001 |
|                             | 75+            | .243             | .203   | .280    | <.001 |
| Sex (ref: male)             |                | .115             | .078   | .150    | <.001 |
| Living in the countryside   |                | -.052            | -.083  | -.012   | .009  |
| Currently married           |                | -.029            | -.073  | .010    | .141  |
| Education                   | None           |                  |        |         |       |
|                             | Some           | .017             | -.018  | .052    | .330  |
|                             | Primary & more | -.041            | -.079  | -.004   | .029  |
| Ethnicity                   | Dafin          |                  |        |         |       |
|                             | Bwama          | .015             | -.023  | .050    | .456  |
|                             | Mossi          | .001             | -.031  | .034    | .938  |
|                             | Other          | .025             | -.017  | .080    | .200  |
| Wealth quintile             | 1              |                  |        |         |       |
|                             | 2              | -.024            | -.067  | .020    | .285  |
|                             | 3              | -.054            | -.099  | -.010   | .017  |
|                             | 4              | -.069            | -.113  | -.023   | .003  |
|                             | 5              | -.083            | -.132  | -.036   | .001  |
| <b>Hypertriglyceridemia</b> |                | -.006            | -.040  | .029    | .742  |

**Supplementary Table 9: Linear regression model 4  
(Reduced HDL-cholesterol)**

|                                |                | Model 4 (n=2330) |              |             |             |
|--------------------------------|----------------|------------------|--------------|-------------|-------------|
|                                |                | beta             | CI low       | CI high     | p           |
| Age                            | 40-44          | -                | -            | -           | -           |
|                                | 45-49          | .019             | -.028        | .065        | .425        |
|                                | 50-54          | .061             | .015         | .106        | .009        |
|                                | 55-59          | .110             | .063         | .151        | <.001       |
|                                | 60-64          | .154             | .107         | .193        | <.001       |
|                                | 65-69          | .185             | .141         | .227        | <.001       |
|                                | 70-74          | .170             | .124         | .206        | <.001       |
|                                | 75+            | .234             | .196         | .283        | <.001       |
| Sex (ref: male)                |                | .134             | .091         | .174        | <.001       |
| Living in the countryside      |                | -.028            | -.078        | .016        | .193        |
| Currently married              |                | -.031            | -.079        | .013        | .158        |
| Education                      | None           |                  |              |             |             |
|                                | Some           | .004             | -.034        | .042        | .843        |
|                                | Primary & more | -.035            | -.084        | .006        | .092        |
| Ethnicity                      | Dafin          |                  |              |             |             |
|                                | Bwama          | .007             | -.032        | .045        | .745        |
|                                | Mossi          | -.016            | -.051        | .022        | .437        |
|                                | Other          | .010             | -.048        | .080        | .620        |
| Wealth quintile                | 1              |                  |              |             |             |
|                                | 2              | -.035            | -.080        | .012        | .147        |
|                                | 3              | -.059            | -.106        | -.010       | .017        |
|                                | 4              | -.075            | -.121        | -.025       | .003        |
|                                | 5              | -.072            | -.133        | -.026       | .004        |
| <b>Reduced HDL-cholesterol</b> |                | <b>-.027</b>     | <b>-.067</b> | <b>.012</b> | <b>.177</b> |

**Supplementary Table 10: Linear regression model 5  
(Hypertension grade I)**

|                             |                | Model 5 (n=2970) |        |         |       |
|-----------------------------|----------------|------------------|--------|---------|-------|
|                             |                | beta             | CI low | CI high | p     |
| Age                         | 40-44          | -                | -      | -       | -     |
|                             | 45-49          | .016             | -.025  | .057    | .441  |
|                             | 50-54          | .057             | .017   | .097    | .006  |
|                             | 55-59          | .098             | .058   | .137    | <.001 |
|                             | 60-64          | .139             | .099   | .177    | <.001 |
|                             | 65-69          | .185             | .145   | .222    | <.001 |
|                             | 70-74          | .161             | .123   | .197    | <.001 |
|                             | 75+            | .235             | .196   | .271    | <.001 |
| Sex (ref: male)             |                | .119             | .082   | .154    | <.001 |
| Living in the countryside   |                | -.046            | -.077  | -.007   | .020  |
| Currently married           |                | -.028            | -.072  | .010    | .141  |
| Education                   | None           |                  |        |         |       |
|                             | Some           | .020             | -.015  | .054    | .257  |
|                             | Primary & more | -.034            | -.071  | .002    | .067  |
| Ethnicity                   | Dafin          |                  |        |         |       |
|                             | Bwama          | .020             | -.018  | .054    | .326  |
|                             | Mossi          | .000             | -.032  | .032    | .982  |
|                             | Other          | .027             | -.014  | .081    | .164  |
| Wealth quintile             | 1              |                  |        |         |       |
|                             | 2              | -.019            | -.062  | .024    | .379  |
|                             | 3              | -.055            | -.099  | -.011   | .014  |
|                             | 4              | -.066            | -.110  | -.022   | .004  |
|                             | 5              | -.087            | -.134  | -.040   | <.001 |
| <b>Hypertension grade I</b> |                | .028             | -.007  | .062    | .113  |

**Supplementary Table 11:** Linear regression model 6  
(Fasting Plasma Glucose > 100 mg/dl)

|                                              |                | Model 6 (n=2038) |        |         |       |
|----------------------------------------------|----------------|------------------|--------|---------|-------|
|                                              |                | beta             | CI low | CI high | p     |
| Age                                          | 40-44          | -                | -      | -       | -     |
|                                              | 45-49          | .002             | -.046  | .049    | .939  |
|                                              | 50-54          | .049             | .000   | .093    | .048  |
|                                              | 55-59          | .102             | .053   | .144    | <.001 |
|                                              | 60-64          | .143             | .096   | .188    | <.001 |
|                                              | 65-69          | .192             | .144   | .236    | <.001 |
|                                              | 70-74          | .125             | .078   | .164    | <.001 |
|                                              | 75+            | .246             | .206   | .297    | <.001 |
| Sex (ref: male)                              |                | .114             | .069   | .153    | <.001 |
| Living in the countryside                    |                | -.077            | -.114  | -.028   | .001  |
| Currently married                            |                | -.016            | -.065  | .031    | .488  |
| Education                                    | None           |                  |        |         |       |
|                                              | Some           | .024             | -.018  | .068    | .257  |
|                                              | Primary & more | -.066            | -.107  | -.021   | .004  |
| Ethnicity                                    | Dafin          |                  |        |         |       |
|                                              | Bwama          | -.003            | -.045  | .040    | .904  |
|                                              | Mossi          | .010             | -.028  | .045    | .663  |
|                                              | Other          | .030             | -.019  | .094    | .190  |
| Wealth quintile                              | 1              |                  |        |         |       |
|                                              | 2              | -.028            | -.078  | .024    | .295  |
|                                              | 3              | -.058            | -.110  | -.004   | .035  |
|                                              | 4              | -.077            | -.126  | -.021   | .006  |
|                                              | 5              | -.101            | -.154  | -.042   | .001  |
| <b>Fasting Plasma Glucose &gt; 100 mg/dl</b> |                | -.022            | -.061  | .019    | .298  |

**Supplementary Table 12:** Linear regression model 7  
(Hypertension grade II)

|                              |                | Model 7 (n=2970) |        |         |       |
|------------------------------|----------------|------------------|--------|---------|-------|
|                              |                | beta             | CI low | CI high | p     |
| Age                          | 40-44          | -                | -      | -       | -     |
|                              | 45-49          | .017             | -.024  | .058    | .422  |
|                              | 50-54          | .059             | .018   | .099    | .004  |
|                              | 55-59          | .100             | .060   | .139    | <.001 |
|                              | 60-64          | .141             | .102   | .179    | <.001 |
|                              | 65-69          | .188             | .148   | .224    | <.001 |
|                              | 70-74          | .163             | .125   | .199    | <.001 |
|                              | 75+            | .237             | .197   | .273    | <.001 |
| Sex (ref: male)              |                | .118             | .082   | .154    | <.001 |
| Living in the countryside    |                | -.047            | -.078  | -.008   | .016  |
| Currently married            |                | -.028            | -.072  | .010    | .143  |
| Education                    | None           |                  |        |         |       |
|                              | Some           | .019             | -.015  | .054    | .274  |
|                              | Primary & more | -.033            | -.070  | .003    | .072  |
| Ethnicity                    | Dafin          |                  |        |         |       |
|                              | Bwama          | .020             | -.017  | .054    | .309  |
|                              | Mossi          | -.001            | -.033  | .031    | .946  |
|                              | Other          | .026             | -.015  | .081    | .176  |
| Wealth quintile              | 1              |                  |        |         |       |
|                              | 2              | -.019            | -.062  | .024    | .386  |
|                              | 3              | -.055            | -.099  | -.011   | .014  |
|                              | 4              | -.066            | -.109  | -.021   | .004  |
|                              | 5              | -.086            | -.133  | -.039   | <.001 |
| <b>Hypertension grade II</b> |                | .014             | -.020  | .048    | .427  |

**Supplementary Table 13: Linear regression model 8  
(Pre-diabetes)**

|                           |                | Model 8 (n=2143) |        |         |       |
|---------------------------|----------------|------------------|--------|---------|-------|
|                           |                | beta             | CI low | CI high | p     |
| Age                       | 40-44          | -                | -      | -       | -     |
|                           | 45-49          | .005             | -.042  | .052    | .838  |
|                           | 50-54          | .050             | .002   | .093    | .040  |
|                           | 55-59          | .099             | .050   | .139    | <.001 |
|                           | 60-64          | .142             | .096   | .187    | <.001 |
|                           | 65-69          | .204             | .155   | .244    | <.001 |
|                           | 70-74          | .128             | .082   | .166    | <.001 |
|                           | 75+            | .240             | .198   | .287    | <.001 |
| Sex (ref: male)           |                | .110             | .066   | .148    | <.001 |
| Living in the countryside |                | -.070            | -.106  | -.022   | .003  |
| Currently married         |                | -.018            | -.065  | .028    | .432  |
| Education                 | None           |                  |        |         |       |
|                           | Some           | .026             | -.015  | .067    | .216  |
|                           | Primary & more | -.071            | -.110  | -.026   | .001  |
| Ethnicity                 | Dafin          |                  |        |         |       |
|                           | Bwama          | .000             | -.041  | .041    | .999  |
|                           | Mossi          | .007             | -.030  | .042    | .756  |
|                           | Other          | .038             | -.008  | .102    | .097  |
| Wealth quintile           | 1              |                  |        |         |       |
|                           | 2              | -.024            | -.073  | .027    | .368  |
|                           | 3              | -.056            | -.106  | -.003   | .040  |
|                           | 4              | -.067            | -.115  | -.013   | .014  |
|                           | 5              | -.097            | -.148  | -.039   | .001  |
| <b>Pre-diabetes</b>       |                | .005             | -.034  | .043    | .819  |

**Supplementary Table 14:** Linear regression model 9  
(Diabetes)

|                           |                | Model 9 (n=2043) |        |         |       |
|---------------------------|----------------|------------------|--------|---------|-------|
|                           |                | beta             | CI low | CI high | p     |
| Age                       | 40-44          | -                | -      | -       | -     |
|                           | 45-49          | .001             | -.047  | .048    | .983  |
|                           | 50-54          | .048             | .000   | .092    | .051  |
|                           | 55-59          | .104             | .055   | .146    | <.001 |
|                           | 60-64          | .143             | .096   | .188    | <.001 |
|                           | 65-69          | .191             | .143   | .235    | <.001 |
|                           | 70-74          | .123             | .077   | .163    | <.001 |
|                           | 75+            | .246             | .204   | .295    | <.001 |
| Sex (ref: male)           |                | .112             | .066   | .150    | <.001 |
| Living in the countryside |                | -.081            | -.118  | -.031   | .001  |
| Currently married         |                | -.017            | -.065  | .030    | .474  |
| Education                 | None           |                  |        |         |       |
|                           | Some           | .031             | -.011  | .075    | .147  |
|                           | Primary & more | -.066            | -.105  | -.020   | .004  |
| Ethnicity                 | Dafin          |                  |        |         |       |
|                           | Bwama          | -.010            | -.051  | .033    | .672  |
|                           | Mossi          | .008             | -.030  | .043    | .735  |
|                           | Other          | .031             | -.018  | .095    | .179  |
| Wealth quintile           | 1              |                  |        |         |       |
|                           | 2              | -.033            | -.082  | .019    | .227  |
|                           | 3              | -.069            | -.120  | -.014   | .013  |
|                           | 4              | -.083            | -.132  | -.027   | .003  |
|                           | 5              | -.105            | -.158  | -.045   | <.001 |
| <b>Diabetes</b>           |                | -.001            | -.040  | .039    | .972  |

**Supplementary Table 15: Linear regression model 10  
(Self-reported hypertension)**

|                                   |                | Model 10 (n=2972) |        |         |       |
|-----------------------------------|----------------|-------------------|--------|---------|-------|
|                                   |                | beta              | CI low | CI high | p     |
| Age                               | 40-44          | -                 | -      | -       | -     |
|                                   | 45-49          | .016              | -.025  | .057    | .434  |
|                                   | 50-54          | .056              | .015   | .095    | .007  |
|                                   | 55-59          | .093              | .053   | .131    | <.001 |
|                                   | 60-64          | .143              | .103   | .180    | <.001 |
|                                   | 65-69          | .179              | .140   | .217    | <.001 |
|                                   | 70-74          | .152              | .115   | .190    | <.001 |
|                                   | 75+            | .235              | .196   | .271    | <.001 |
| Sex (ref: male)                   |                | .119              | .083   | .155    | <.001 |
| Living in the countryside         |                | -.044             | -.074  | -.005   | .027  |
| Currently married                 |                | -.036             | -.080  | .003    | .066  |
| Education                         | None           |                   |        |         |       |
|                                   | Some           | .017              | -.017  | .051    | .329  |
|                                   | Primary & more | -.027             | -.062  | .010    | .152  |
| Ethnicity                         | Dafin          |                   |        |         |       |
|                                   | Bwama          | .017              | -.021  | .051    | .404  |
|                                   | Mossi          | .000              | -.032  | .032    | .999  |
|                                   | Other          | .026              | -.014  | .081    | .172  |
| Wealth quintile                   | 1              |                   |        |         |       |
|                                   | 2              | -.015             | -.058  | .029    | .512  |
|                                   | 3              | -.050             | -.093  | -.005   | .028  |
|                                   | 4              | -.060             | -.104  | -.015   | .009  |
|                                   | 5              | -.087             | -.133  | -.039   | <.001 |
| <b>Self-reported hypertension</b> |                | .032              | -.003  | .066    | .071  |



**Supplementary Table 16: Linear regression model 11  
(Self-reported diabetes)**

|                               |                | Model 11 (n=2991) |        |         |       |
|-------------------------------|----------------|-------------------|--------|---------|-------|
|                               |                | beta              | CI low | CI high | p     |
| Age                           | 40-44          | -                 | -      | -       | -     |
|                               | 45-49          | .013              | -.028  | .053    | .541  |
|                               | 50-54          | .058              | .018   | .097    | .005  |
|                               | 55-59          | .098              | .057   | .135    | <.001 |
|                               | 60-64          | .144              | .104   | .181    | <.001 |
|                               | 65-69          | .182              | .143   | .219    | <.001 |
|                               | 70-74          | .154              | .117   | .190    | <.001 |
|                               | 75+            | .233              | .194   | .269    | <.001 |
| Sex (ref: male)               |                | .123              | .086   | .158    | <.001 |
| Living in the countryside     |                | -.044             | -.074  | -.005   | .024  |
| Currently married             |                | -.036             | -.080  | .002    | .062  |
| Education                     | None           |                   |        |         |       |
|                               | Some           | .020              | -.014  | .054    | .250  |
|                               | Primary & more | -.024             | -.060  | .012    | .195  |
| Ethnicity                     | Dafin          |                   |        |         |       |
|                               | Bwama          | .016              | -.022  | .050    | .438  |
|                               | Mossi          | -.001             | -.032  | .031    | .965  |
|                               | Other          | .023              | -.018  | .076    | .230  |
| Wealth quintile               | 1              |                   |        |         |       |
|                               | 2              | -.015             | -.058  | .028    | .500  |
|                               | 3              | -.054             | -.097  | -.010   | .016  |
|                               | 4              | -.065             | -.108  | -.020   | .004  |
|                               | 5              | -.085             | -.130  | -.037   | <.001 |
| <b>Self-reported diabetes</b> |                | .004              | -.029  | .038    | .809  |

**Supplementary Table 17: Linear regression model 12  
(Self-reported heart disease)**

|                                    |                | Model 12 (n=3001) |        |         |       |
|------------------------------------|----------------|-------------------|--------|---------|-------|
|                                    |                | beta              | CI low | CI high | p     |
| Age                                | 40-44          | -                 | -      | -       | -     |
|                                    | 45-49          | .012              | -.029  | .052    | .567  |
|                                    | 50-54          | .056              | .016   | .095    | .006  |
|                                    | 55-59          | .094              | .054   | .132    | <.001 |
|                                    | 60-64          | .143              | .105   | .181    | <.001 |
|                                    | 65-69          | .181              | .143   | .219    | <.001 |
|                                    | 70-74          | .161              | .124   | .197    | <.001 |
|                                    | 75+            | .236              | .197   | .272    | <.001 |
| Sex (ref: male)                    |                | .112              | .076   | .148    | <.001 |
| Living in the countryside          |                | -.047             | -.077  | -.008   | .016  |
| Currently married                  |                | -.029             | -.072  | .009    | .128  |
| Education                          | None           |                   |        |         |       |
|                                    | Some           | .018              | -.017  | .052    | .314  |
|                                    | Primary & more | -.026             | -.062  | .010    | .159  |
| Ethnicity                          | Dafin          |                   |        |         |       |
|                                    | Bwama          | .016              | -.021  | .051    | .410  |
|                                    | Mossi          | -.002             | -.033  | .030    | .931  |
|                                    | Other          | .021              | -.021  | .074    | .272  |
| Wealth quintile                    | 1              |                   |        |         |       |
|                                    | 2              | -.021             | -.063  | .022    | .338  |
|                                    | 3              | -.058             | -.102  | -.015   | .009  |
|                                    | 4              | -.071             | -.115  | -.027   | .002  |
|                                    | 5              | -.092             | -.138  | -.045   | <.001 |
| <b>Self-reported heart disease</b> |                | .081              | .047   | .114    | <.001 |

**Supplementary Table 18: Linear regression model 13  
(Self-reported stroke)**

|                             |                | Model 13 (n=3026) |        |         |       |
|-----------------------------|----------------|-------------------|--------|---------|-------|
|                             |                | beta              | CI low | CI high | p     |
| Age                         | 40-44          | -                 | -      | -       | -     |
|                             | 45-49          | .015              | -.025  | .056    | .455  |
|                             | 50-54          | .058              | .018   | .097    | .004  |
|                             | 55-59          | .094              | .055   | .133    | <.001 |
|                             | 60-64          | .143              | .104   | .181    | <.001 |
|                             | 65-69          | .185              | .147   | .222    | <.001 |
|                             | 70-74          | .162              | .125   | .198    | <.001 |
|                             | 75+            | .236              | .197   | .272    | <.001 |
| Sex (ref: male)             |                | .122              | .086   | .157    | <.001 |
| Living in the countryside   |                | -.049             | -.079  | -.010   | .012  |
| Currently married           |                | -.031             | -.074  | .008    | .110  |
| Education                   | None           |                   |        |         |       |
|                             | Some           | .019              | -.015  | .053    | .282  |
|                             | Primary & more | -.027             | -.062  | .009    | .147  |
| Ethnicity                   | Dafin          |                   |        |         |       |
|                             | Bwama          | .019              | -.018  | .053    | .344  |
|                             | Mossi          | -.001             | -.032  | .031    | .960  |
|                             | Other          | .023              | -.018  | .076    | .224  |
| Wealth quintile             | 1              |                   |        |         |       |
|                             | 2              | -.018             | -.061  | .024    | .401  |
|                             | 3              | -.055             | -.098  | -.011   | .014  |
|                             | 4              | -.065             | -.109  | -.021   | .004  |
|                             | 5              | -.087             | -.134  | -.040   | <.001 |
| <b>Self-reported stroke</b> |                | .038              | .005   | .071    | .024  |

**Supplementary Table 19: Linear regression model 14  
(Sudden drooping)**

|                           |                | Model 14 (n=3026) |        |         |       |
|---------------------------|----------------|-------------------|--------|---------|-------|
|                           |                | beta              | CI low | CI high | p     |
| Age                       | 40-44          | -                 | -      | -       | -     |
|                           | 45-49          | .013              | -.027  | .054    | .519  |
|                           | 50-54          | .054              | .014   | .093    | .008  |
|                           | 55-59          | .094              | .055   | .132    | <.001 |
|                           | 60-64          | .137              | .099   | .175    | <.001 |
|                           | 65-69          | .183              | .144   | .220    | <.001 |
|                           | 70-74          | .157              | .120   | .193    | <.001 |
|                           | 75+            | .235              | .196   | .271    | <.001 |
| Sex (ref: male)           |                | .120              | .084   | .155    | <.001 |
| Living in the countryside |                | -.049             | -.078  | -.010   | .012  |
| Currently married         |                | -.031             | -.075  | .006    | .100  |
| Education                 | None           |                   |        |         |       |
|                           | Some           | .019              | -.015  | .053    | .284  |
|                           | Primary & more | -.027             | -.062  | .009    | .147  |
| Ethnicity                 | Dafin          |                   |        |         |       |
|                           | Bwama          | .015              | -.021  | .049    | .438  |
|                           | Mossi          | -.001             | -.033  | .030    | .947  |
|                           | Other          | .022              | -.019  | .075    | .241  |
| Wealth quintile           | 1              |                   |        |         |       |
|                           | 2              | -.017             | -.059  | .026    | .446  |
|                           | 3              | -.056             | -.099  | -.013   | .012  |
|                           | 4              | -.066             | -.109  | -.022   | .003  |
|                           | 5              | -.087             | -.133  | -.041   | <.001 |
| <b>Sudden drooping</b>    |                | .090              | .057   | .123    | <.001 |

**Supplementary Table 20: Linear regression model 15  
(Sudden numbness)**

|                           |                | Model 15 (n=3026) |        |         |       |
|---------------------------|----------------|-------------------|--------|---------|-------|
|                           |                | beta              | CI low | CI high | p     |
| Age                       | 40-44          | -                 | -      | -       | -     |
|                           | 45-49          | .017              | -.024  | .057    | .419  |
|                           | 50-54          | .059              | .019   | .098    | .004  |
|                           | 55-59          | .095              | .056   | .133    | <.001 |
|                           | 60-64          | .135              | .096   | .172    | <.001 |
|                           | 65-69          | .178              | .140   | .215    | <.001 |
|                           | 70-74          | .155              | .118   | .190    | <.001 |
|                           | 75+            | .227              | .189   | .263    | <.001 |
| Sex (ref: male)           |                | .117              | .081   | .151    | <.001 |
| Living in the countryside |                | -.051             | -.080  | -.012   | .008  |
| Currently married         |                | -.034             | -.078  | .003    | .071  |
| Education                 | None           |                   |        |         |       |
|                           | Some           | .016              | -.018  | .049    | .366  |
|                           | Primary & more | -.026             | -.062  | .009    | .147  |
| Ethnicity                 | Dafin          |                   |        |         |       |
|                           | Bwama          | .017              | -.019  | .051    | .380  |
|                           | Mossi          | .001              | -.031  | .032    | .965  |
|                           | Other          | .020              | -.022  | .072    | .291  |
| Wealth quintile           | 1              |                   |        |         |       |
|                           | 2              | -.019             | -.061  | .023    | .378  |
|                           | 3              | -.061             | -.104  | -.017   | .006  |
|                           | 4              | -.072             | -.115  | -.028   | .001  |
|                           | 5              | -.097             | -.143  | -.051   | <.001 |
| <b>Sudden numbness</b>    |                | .136              | .102   | .168    | <.001 |

**Supplementary Table 21: Linear regression model 16  
(Sudden slurring)**

|                           |                | Model 16 (n=3026) |        |         |       |
|---------------------------|----------------|-------------------|--------|---------|-------|
|                           |                | beta              | CI low | CI high | p     |
| Age                       | 40-44          | -                 | -      | -       | -     |
|                           | 45-49          | .016              | -.025  | .055    | .448  |
|                           | 50-54          | .056              | .017   | .096    | .005  |
|                           | 55-59          | .093              | .054   | .131    | <.001 |
|                           | 60-64          | .134              | .096   | .172    | <.001 |
|                           | 65-69          | .175              | .137   | .212    | <.001 |
|                           | 70-74          | .155              | .118   | .190    | <.001 |
|                           | 75+            | .227              | .189   | .263    | <.001 |
| Sex (ref: male)           |                | .117              | .081   | .151    | <.001 |
| Living in the countryside |                | -.052             | -.081  | -.013   | .007  |
| Currently married         |                | -.037             | -.081  | .000    | .050  |
| Education                 | None           |                   |        |         |       |
|                           | Some           | .019              | -.015  | .053    | .264  |
|                           | Primary & more | -.029             | -.064  | .007    | .113  |
| Ethnicity                 | Dafin          |                   |        |         |       |
|                           | Bwama          | .017              | -.019  | .051    | .379  |
|                           | Mossi          | .001              | -.030  | .032    | .954  |
|                           | Other          | .017              | -.026  | .068    | .374  |
| Wealth quintile           | 1              |                   |        |         |       |
|                           | 2              | -.022             | -.064  | .020    | .312  |
|                           | 3              | -.060             | -.103  | -.017   | .006  |
|                           | 4              | -.072             | -.116  | -.029   | .001  |
|                           | 5              | -.091             | -.136  | -.044   | <.001 |
| <b>Sudden slurring</b>    |                | .144              | .110   | .176    | <.001 |

**Supplementary Table 22: Linear regression model 17**  
(Self-reported metabolic syndrome)

Dependent variable: Z-scored PHQ-9

|                                         |                | Model 17 (n=2948) |        |         |       |
|-----------------------------------------|----------------|-------------------|--------|---------|-------|
|                                         |                | beta              | CI low | CI high | p     |
| Age                                     | 40-44          | -                 | -      | -       | -     |
|                                         | 45-49          | .014              | -.027  | .055    | .497  |
|                                         | 50-54          | .055              | .014   | .094    | .008  |
|                                         | 55-59          | .092              | .052   | .130    | <.001 |
|                                         | 60-64          | .141              | .101   | .178    | <.001 |
|                                         | 65-69          | .174              | .135   | .212    | <.001 |
|                                         | 70-74          | .151              | .114   | .188    | <.001 |
|                                         | 75+            | .230              | .190   | .266    | <.001 |
| Sex (ref: male)                         |                | .117              | .080   | .152    | <.001 |
| Living in the countryside               |                | -.039             | -.070  | .000    | .049  |
| Currently married                       |                | -.039             | -.083  | -.001   | .045  |
| Education                               | None           |                   |        |         |       |
|                                         | Some           | .018              | -.017  | .052    | .314  |
|                                         | Primary & more | -.029             | -.064  | .008    | .124  |
| Ethnicity                               | Dafin          |                   |        |         |       |
|                                         | Bwama          | .015              | -.022  | .049    | .460  |
|                                         | Mossi          | -.001             | -.033  | .031    | .956  |
|                                         | Other          | .024              | -.017  | .079    | .201  |
| Wealth quintile                         | 1              |                   |        |         |       |
|                                         | 2              | -.016             | -.059  | .027    | .459  |
|                                         | 3              | -.051             | -.095  | -.007   | .024  |
|                                         | 4              | -.066             | -.110  | -.021   | .004  |
|                                         | 5              | -.091             | -.137  | -.042   | <.001 |
| <b>Self-reported metabolic syndrome</b> |                | .070              | .035   | .104    | <.001 |

**Supplementary Table 23:** Descriptive statistics of the self-reported diagnosis of hypertension and diabetes within the whole sample

|                                                | Total                          | Female                         | Male                           |
|------------------------------------------------|--------------------------------|--------------------------------|--------------------------------|
| <b>Self-reported diagnosis of hypertension</b> | <i>n</i> = 3007<br>507 (17.1%) | <i>n</i> = 1513<br>294 (19.8%) | <i>n</i> = 1494<br>213 (14.4%) |
| <b>Self-reported diagnosis of diabetes</b>     | <i>n</i> = 2993<br>70 (2.3%)   | <i>n</i> = 1505<br>32 (2.1%)   | <i>n</i> = 1488<br>38 (2.6%)   |

**Supplementary Table 24:** Descriptive statistics of the self-reported diagnosis of hypertension and diabetes within the affected\* part of the sample

|                                                | Total                          | Female                        | Male                          |
|------------------------------------------------|--------------------------------|-------------------------------|-------------------------------|
| <b>Self-reported diagnosis of hypertension</b> | <i>n</i> = 1674<br>346 (21.0%) | <i>n</i> = 841<br>203 (24.6%) | <i>n</i> = 832<br>143 (17.3%) |
| <b>Self-reported diagnosis of diabetes</b>     | <i>n</i> = 143<br>20 (14.0%)   | <i>n</i> = 85<br>11 (13.0%)   | <i>n</i> = 58<br>9 (15.5%)    |

\*In case of Hypertension: Systolic BP >130 mmHg or Diastolic BP >80 mmHg  
Diabetes: Fasting Glucose >126 mg/dl, random glucose >200 mg/dl or HbA1c >6.5%

**Supplementary Table 25:** Measuring the effect of a diagnosis of hypertension/diabetes given by a health care worker among hypertensive/diabetic part of the population. Given in the table are the standardized coefficients of multiple linear regression of the z-scored PHQ-9 score on self-reported diagnosis of hypertension within the hypertensive population<sup>a</sup> and diagnosis of diabetes within the diabetic population<sup>b</sup>.

|                                              | Standardized beta coefficient | p-value |
|----------------------------------------------|-------------------------------|---------|
| <b>Ever been diagnosed with hypertension</b> | 0.033                         | 0.061   |
| <b>Ever been diagnosed with diabetes</b>     | -0.025                        | 0.762   |

All variables used in separate models controlling for age, sex, gender, place of residence, education, ethnicity and wealth quintile.

<sup>a</sup> Systolic BP >130 mmHg or Diastolic BP >80 mmHg

<sup>b</sup> Fasting Glucose >126 mg/dl, random glucose >200 mg/dl or HbA1c >6.5%
